# Supplementary material for: Ligand free FeSn2 alloy nanoparticles for safe T2-weighted MR imaging of in vivo lung tumors
Source: Royal Society of Chemistry journal article supplement (doi:10.1039/d2bm01517j), 2023-01-01
Supplement: d2bm01517j1.pdf [file d2bm01517j1.pdf]

Supporting information

## Ligand Free FeSn<sub>2</sub> Alloy Nanoparticles for Safe T2-weighted MR Imaging of *In vivo* Lung Tumors

Suresh Thangudu<sup>a,b,#</sup>, Wei-Che Lin<sup>b,#</sup>, Chin-Lai Lee<sup>b</sup>, , Min-Chiao Liao<sup>c</sup>, Chun-Chieh Yu<sup>d</sup>, Yu-Ming Wang<sup>c\*</sup>, Chia-Hao Su<sup>a,b,c,e\*</sup>

a. Center for General Education, Chang Gung University, Taoyuan, 333, Taiwan.

b. Department of diagnostic radiology, Kaohsiung Chang Gung Memorial Hospital, Kaohsiung 833, Taiwan

c. Department of Radiation Oncology, Kaohsiung Chang Gung Memorial Hospital, Kaohsiung 833, Taiwan

d. Institute for Translational Research in Biomedicine, Kaohsiung Chang Gung Memorial Hospital, Kaohsiung 833, Taiwan

e. Department of Biomedical Imaging and Radiological Sciences, National Yang Ming Chiao Tung University, Taipei 112, Taiwan.

\*Correspondence: [chiralsu@gmail.com](mailto:chiralsu@gmail.com) (CH Su); [scorpion@cgmh.org.tw](mailto:scorpion@cgmh.org.tw) (YM Wang)

# Authors contributed equally to this work

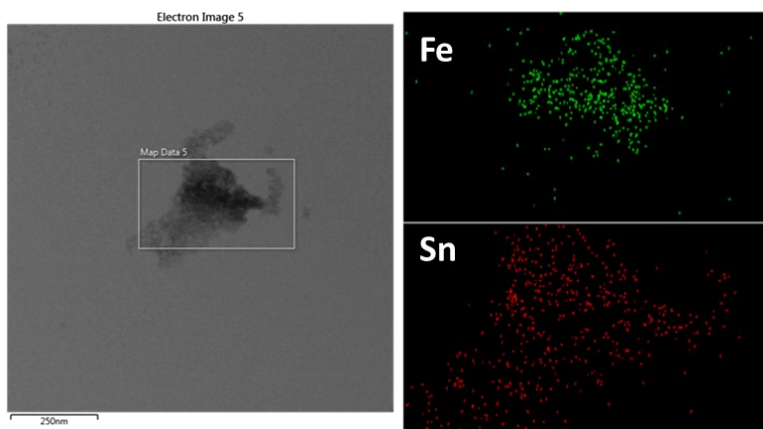

**Figure S1.** Energy Dispersive X-Ray Analysis (EDX) elemental analysis of FeSn<sub>2</sub> alloy NPs.

### Intensity Distribution

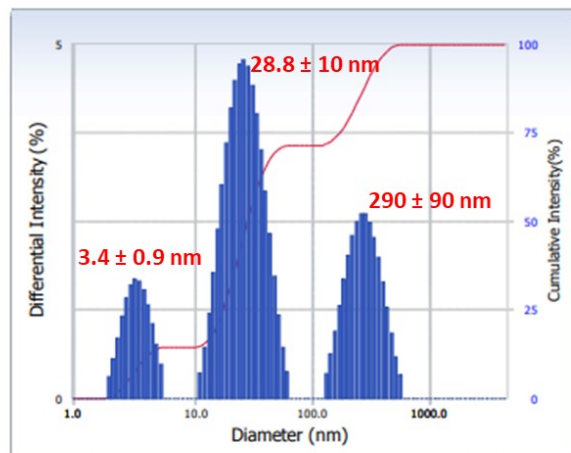

**Figure S2.** DLS spectra of FeSn<sub>2</sub> alloy NPs (PDI value 0.180).

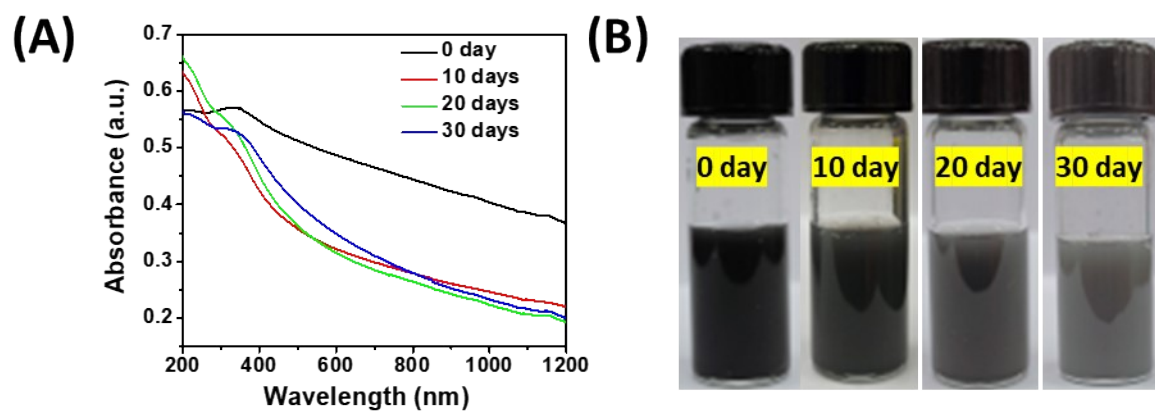

**Figure S3.** (A) and (B) UV-visible absorption spectra and corresponding optical images of FeSn<sub>2</sub> alloy NPs aqueous solutions at different incubation times.

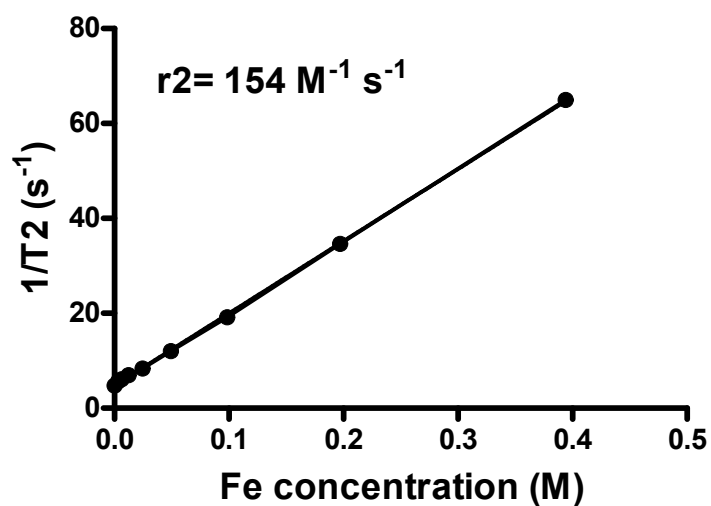

**Figure S4.** Transversal relaxation time ( $1/T_2$ ,  $s^{-1}$ ) against the concentration of Fe in  $FeSn_2$  alloy NPs.

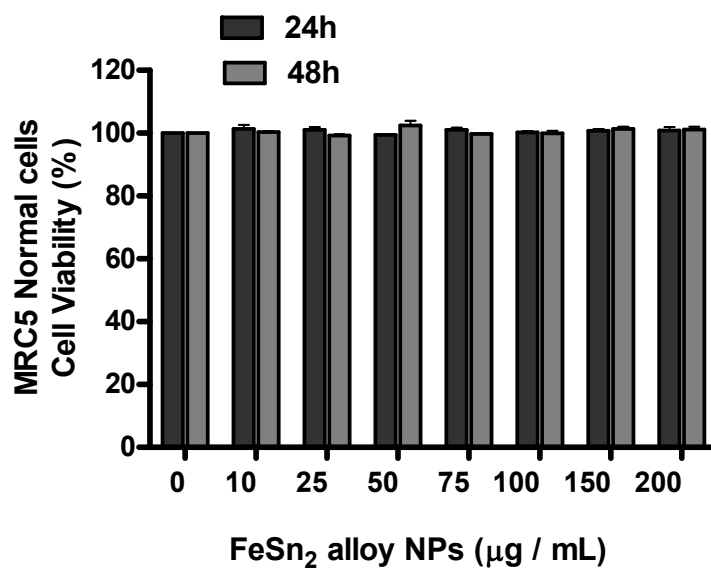

**Figure S5.** Cytotoxicity evaluation of different concentrations of  $FeSn_2$  alloy NPs with the CCK-8 assay.

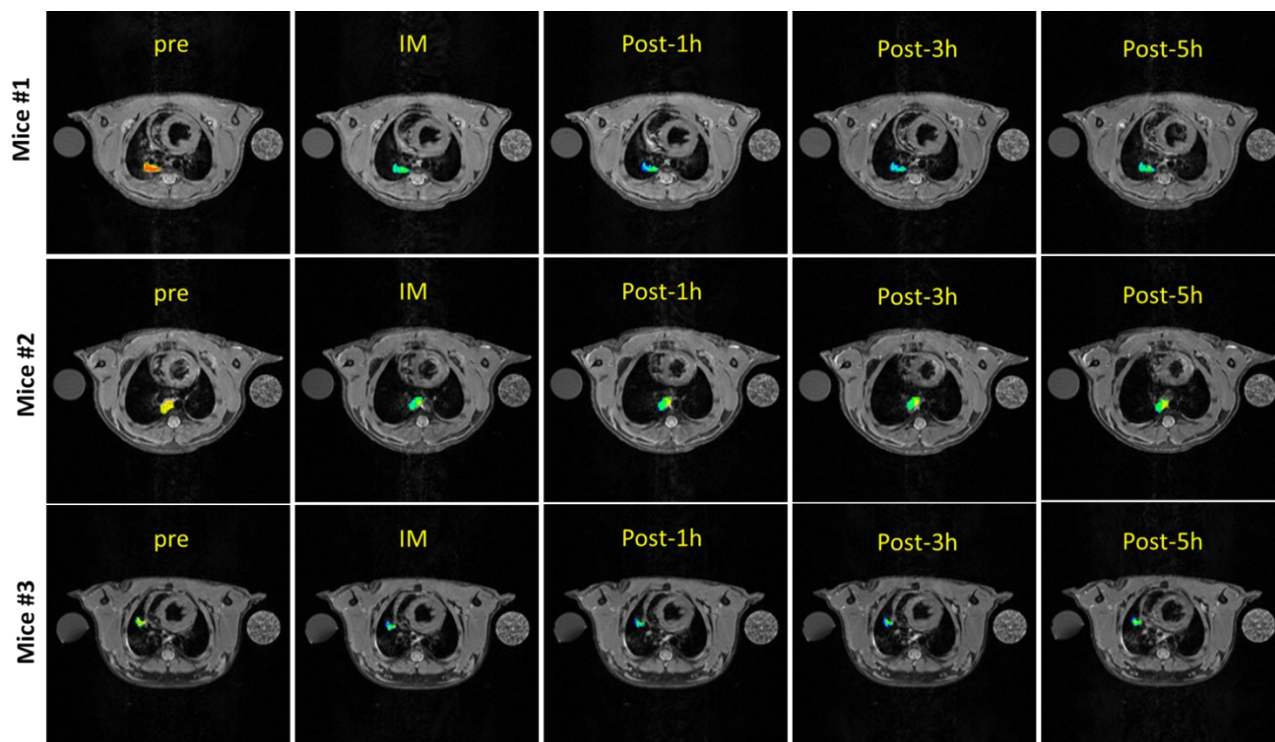

**Figure S6.** *In vivo* MR imaging of lung tumor mice models (n=3) on FeSn<sub>2</sub> alloy NPs (pre, post-injection of NPs-immediately, 1 h, 3 h, 5 h).
